# Supplementary material for: An mHealth Intervention to Improve Medication Adherence and Health Outcomes Among Patients With Coronary Heart Disease: Randomized Controlled Trial
Source: PubMed Central journal article supplement (PMC8943565; doi:10.2196/27202), 2022-03-09
Supplement: jmir_v24i3e27202_app3.pdf [file jmir_v24i3e27202_app3.pdf]

|                                        | <b>All participants (N=196)</b> | <b>Experimental (n=103)</b> | <b>Control (n=93)</b> | <b>P value</b> |
|----------------------------------------|---------------------------------|-----------------------------|-----------------------|----------------|
| <b>Systolic blood pressure (mmHg)</b>  |                                 |                             |                       |                |
| baseline                               | 145 (73.98)                     | 74 (71.84)                  | 71 (76.34)            | .47            |
| 60 days                                | 163 (83.16)                     | 87 (84.47)                  | 76 (81.72)            | .61            |
| 90 days                                | 162 (82.65)                     | 89 (86.41)                  | 73 (78.49)            | .14            |
| <b>Diastolic blood pressure (mmHg)</b> |                                 |                             |                       |                |
| baseline                               | 162 (82.65)                     | 87 (84.47)                  | 75 (80.65)            | .48            |
| 60 days                                | 176 (89.80)                     | 94 (91.26)                  | 82 (88.17)            | .48            |
| 90 days                                | 179 (91.33)                     | 96 (93.20)                  | 81 (87.10)            | .15            |
| <b>Heart rate (bpm)</b>                |                                 |                             |                       |                |
| baseline                               | 173 (88.27)                     | 89 (86.41)                  | 84 (90.32)            | .40            |
| 60 days                                | 145 (73.98)                     | 82 (79.61)                  | 69 (74.19)            | .37            |
| 90 days                                | 141 (71.94)                     | 78 (75.73)                  | 75 (80.65)            | .41            |
