# Supplementary material for: An mHealth Intervention to Improve Medication Adherence and Health Outcomes Among Patients With Coronary Heart Disease: Randomized Controlled Trial
Source: PubMed Central journal article supplement (PMC8943565; doi:10.2196/27202), 2022-03-09
Supplement: jmir_v24i3e27202_app5.pdf [file jmir_v24i3e27202_app5.pdf]

| Item                      | Diastolic blood pressure |                | Systolic blood pressure |                | Heart rate           |                |
|---------------------------|--------------------------|----------------|-------------------------|----------------|----------------------|----------------|
|                           | Parameter estimation     | <i>P</i> value | Parameter estimation    | <i>P</i> value | Parameter estimation | <i>P</i> value |
| Intercept                 | 0.43                     | .83            | 7.06                    | <.001          | -1.13                | .61            |
| Group (reference=control) | 0.15                     | .71            | -0.55                   | .17            | -0.16                | .73            |
| Gender (reference=male)   | 0.32                     | .52            | 0.03                    | .94            | -0.53                | .27            |
| Age                       | 0.04                     | .003           | -0.04                   | .007           | 0.05                 | .003           |
| Education                 | -0.03                    | .77            | -0.11                   | .37            | 0.20                 | .13            |
| Weight                    | -0.02                    | .20            | -0.03                   | .05            | 0.01                 | .47            |
| Time                      | 0.03                     | .01            | 0.03                    | .01            | -0.04                | <.001          |
| Time*time                 | -0.0003                  | .01            | -0.0003                 | .003           | 0.0004               | <.001          |
| Group*time                | 0.006                    | .32            | 0.01                    | .02            | 0.003                | .60            |
