# Supplementary material for: An mHealth Intervention to Improve Medication Adherence and Health Outcomes Among Patients With Coronary Heart Disease: Randomized Controlled Trial
Source: PubMed Central journal article supplement (PMC8943565; doi:10.2196/27202), 2022-03-09
Supplement: jmir_v24i3e27202_app6.pdf [file jmir_v24i3e27202_app6.pdf]

| Variable                                             | All participants | Completed   | Dropped out or lost to follow-up | P value |
|------------------------------------------------------|------------------|-------------|----------------------------------|---------|
| Number of participants                               | 196 (100)        | 181 (92.3)  | 15 (7.7)                         |         |
| <b>Gender</b>                                        |                  |             |                                  | .74     |
| Male                                                 | 157 (80.1)       | 144 (79.6)  | 13 (86.7)                        |         |
| Female                                               | 39 (19.9)        | 37 (20.4)   | 2 (13.3)                         |         |
| <b>Weight (kg), Mean ± SD</b>                        | 67.6 ± 11.3      | 67.7 ± 11.3 | 66.6 ± 10.4                      | .67     |
| <b>Height (cm), Mean ± SD</b>                        | 164.8 ± 8.0      | 164.7 ± 8.1 | 166.7 ± 7.2                      | .48     |
| <b>Age (year), Mean ± SD</b>                         | 61 ± 11          | 61 ± 11     | 59 ± 13                          | .46     |
| <b>Ethnicity</b>                                     |                  |             |                                  | .05     |
| Han                                                  | 184 (93.9)       | 172 (95.0)  | 12 (80.0)                        |         |
| Other ethnic minorities                              | 12 (6.1)         | 9 (5.0)     | 3 (20.0)                         |         |
| <b>Marital status</b>                                |                  |             |                                  | .32     |
| Married                                              | 181 (92.4)       | 168 (92.8)  | 13 (86.7)                        |         |
| Widowed, separated, divorced, or single              | 15 (7.6)         | 13 (7.2)    | 2 (7.2)                          |         |
| <b>Job status</b>                                    |                  |             |                                  | .69     |
| Employed                                             | 65 (34.0)        | 60 (33.7)   | 5 (38.5)                         |         |
| Unemployed                                           | 4 (2.1)          | 4 (2.3)     | 0                                |         |
| Farmer                                               | 19 (10.0)        | 19 (10.7)   | 0                                |         |
| Retired                                              | 103 (53.9)       | 95 (53.4)   | 8 (61.5)                         |         |
| <b>Education</b>                                     |                  |             |                                  | .97     |
| Primary school or lower                              | 31 (16.1)        | 29 (16.2)   | 2 (14.3)                         |         |
| Middle school                                        | 43 (22.3)        | 40 (22.4)   | 3 (21.4)                         |         |
| High school                                          | 47 (24.3)        | 43 (24.0)   | 4 (28.6)                         |         |
| High school—College                                  | 28 (14.5)        | 27 (15.1)   | 1 (7.1)                          |         |
| College or above                                     | 44 (22.8)        | 40 (22.4)   | 4 (28.6)                         |         |
| <b>Number of prescribed medications</b>              |                  |             |                                  | 1.00    |
| < 5                                                  | 75 (38.3)        | 69 (38.1)   | 6 (40.0)                         |         |
| 5 ≤ < 10                                             | 116 (59.2)       | 107 (59.1)  | 9 (60.0)                         |         |
| ≥ 10                                                 | 5 (2.5)          | 5 (2.8)     | 0                                |         |
| <b>Have medical insurance</b>                        | 186 (96.9)       | 172 (95.0)  | 14 (93.3)                        | 1.00    |
| <b>Medications were covered by medical insurance</b> |                  |             |                                  | .75     |
| All covered                                          | 41 (27.9)        | 38 (27.5)   | 3 (33.3)                         |         |
| Some covered                                         | 89 (60.5)        | 84 (60.9)   | 5 (55.6)                         |         |
| Not covered at all                                   | 17 (11.6)        | 16 (11.6)   | 1 (11.1)                         |         |
| <b>Place of residence</b>                            |                  |             |                                  | .73     |
| Urban                                                | 161 (82.1)       | 149 (82.3)  | 12 (80.0)                        |         |
| Rural                                                | 35 (17.9)        | 32 (17.7)   | 3 (20.0)                         |         |
| <b>Living arrangement</b>                            |                  |             |                                  | 1.00    |
| Living alone                                         | 14 (7.1)         | 13 (7.2)    | 1 (6.7)                          |         |
| With family or relatives                             | 182 (92.9)       | 168 (92.8)  | 14 (93.3)                        |         |

|                                                                  |            |            |           |     |
|------------------------------------------------------------------|------------|------------|-----------|-----|
| <b>Length of using WeChat (in years)</b>                         |            |            |           | .80 |
| < 1                                                              | 24 (12.0)  | 23 (12.7)  | 1 (6.7)   |     |
| 1 ≤ < 5                                                          | 109 (56.0) | 101 (55.8) | 8 (53.3)  |     |
| ≥ 5                                                              | 63 (32.0)  | 57 (31.5)  | 6 (40.0)  |     |
| <b>Frequency of WeChat use before participating in the study</b> |            |            |           | .76 |
| Daily                                                            | 152 (80.9) | 139 (80.4) | 13 (86.7) |     |
| Occasionally                                                     | 25 (13.3)  | 24 (13.9)  | 1 (6.7)   |     |
| Never                                                            | 11 (5.8)   | 10 (5.8)   | 1 (6.7)   |     |
| <b>Yearly family income (Chinese Yuan)</b>                       |            |            |           | .78 |
| < 54,000                                                         | 81 (52.3)  | 74 (52.9)  | 7 (46.7)  |     |
| 54,001 – 90,000                                                  | 34 (21.9)  | 29 (20.7)  | 5 (33.3)  |     |
| 90,001 – 120,000                                                 | 18 (11.6)  | 18 (12.9)  | 0         |     |
| > 120,000                                                        | 22 (14.2)  | 19 (13.6)  | 3 (20.0)  |     |
| <b>General health status</b>                                     |            |            |           | .92 |
| Good                                                             | 70 (35.7)  | 64 (35.4)  | 6 (40.0)  |     |
| Fair                                                             | 101 (51.5) | 94 (51.9)  | 7 (46.7)  |     |
| Bad                                                              | 25 (12.8)  | 23 (12.7)  | 2 (13.3)  |     |
